# Supplementary material for: Fast discrimination of fragmentary images: the role of local optimal information
Source: PubMed Central journal article supplement (PMC9945129; doi:10.3389/fnhum.2023.1049615), 2023-02-08
Supplement: Data_Sheet_1.pdf [file Data_Sheet_1.pdf]

## SUPPLEMENTARY MATERIAL

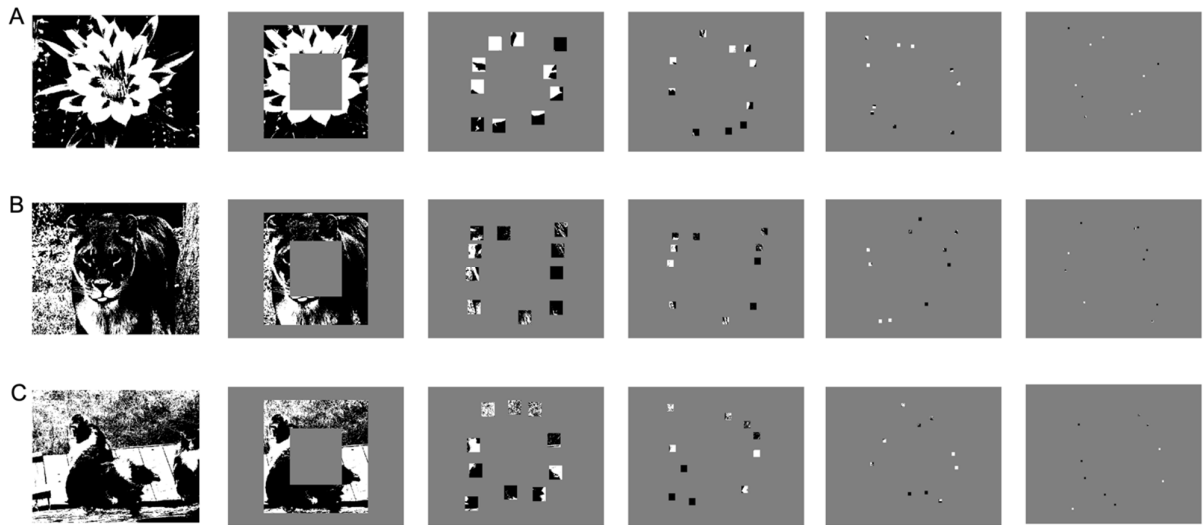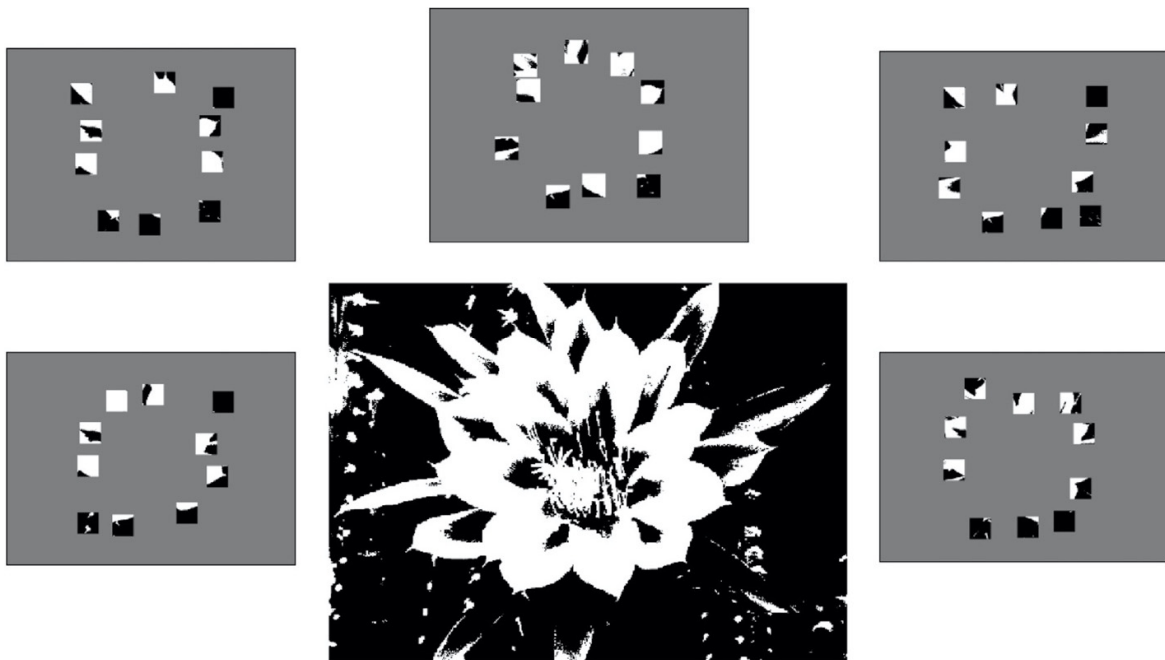

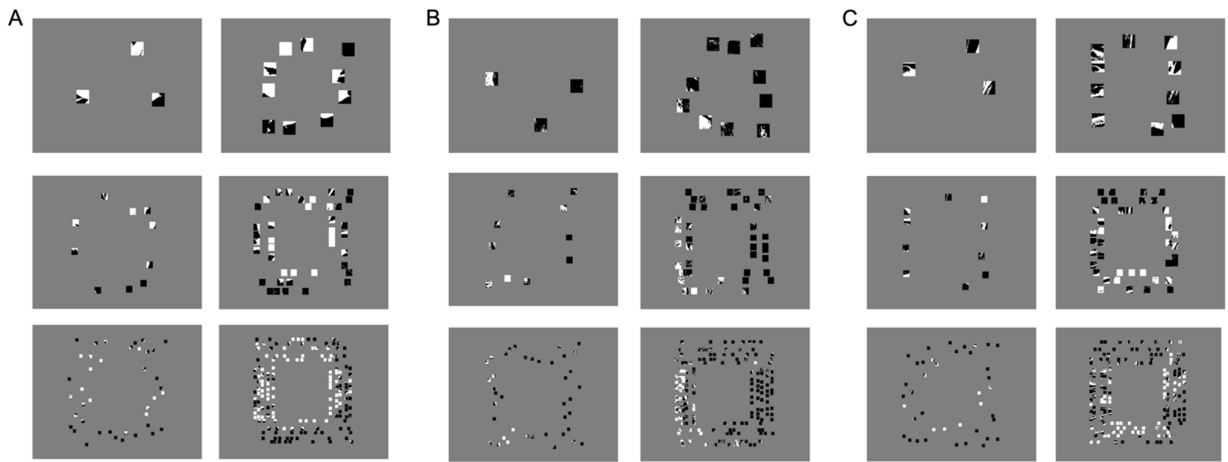

**Supplementary Figure 3. (A-C) Examples of stimuli used in the second preliminary experiment.** In the left column fragments revealed 2% of the image area, and in the right column, fragments revealed 7.5% of the image area. Fragments' size in the images of each column decreases by fifty percent going from top to bottom; whereas fragments in the same row have the same size but vary in number.

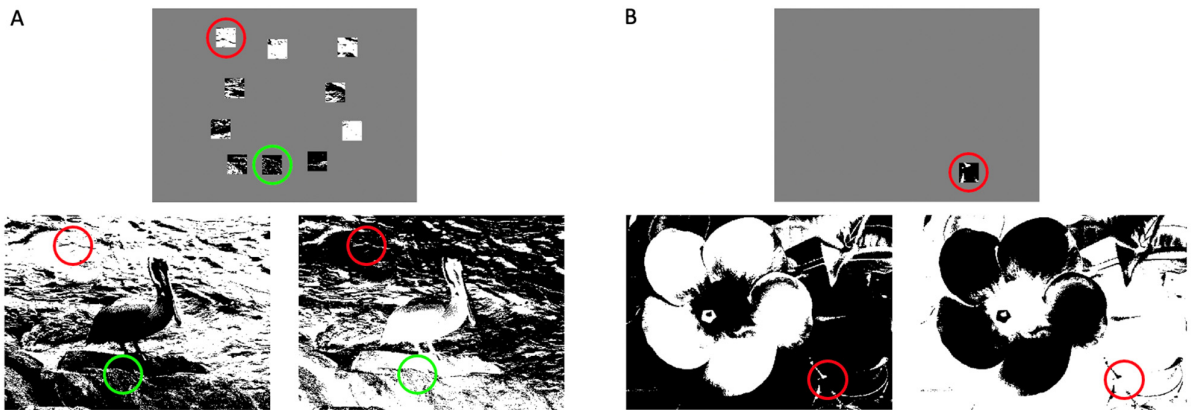

**Supplementary Figure 4. Examples of tasks with original and inverted contrast images.** The upper panels show two examples of fragmented images. The lower left-side panels show the original-contrast images; the lower right-side panels show inverted-contrast images. In these examples, the position of fragments with large black or white parts (red/green circles) can be easily matched in the original contrast images. **(A) Ten fragments (7.5% area).** In the original-contrast image (left-side panel), observers can match the position of the almost all-white fragment presented in the upper-left part of the image and that of the almost all-black fragment presented in the lower part to discriminate the target. Instead, with the inverted-contrast image (right-side panel), this positional match cannot be done. **(B) One fragment (0.75% area).** In the original-contrast image (left-side panel), observers can match the position of the almost all-black fragment presented in the lower-right part of the image to discriminate the target. In the inverted-contrast image (right-side panel), observers cannot find the black spot in the lower-right part of the target.

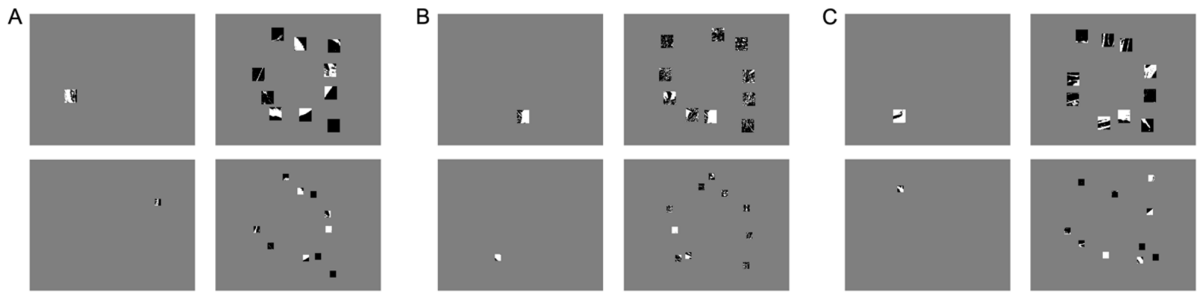

**Supplementary Figure 5. (A-C) Examples of stimuli used in the main experiment.** Fragments in the images of each column have the same number but their size decreases by fifty percent from top to bottom; fragments in the images of each row have the same size but vary in number (one or ten).

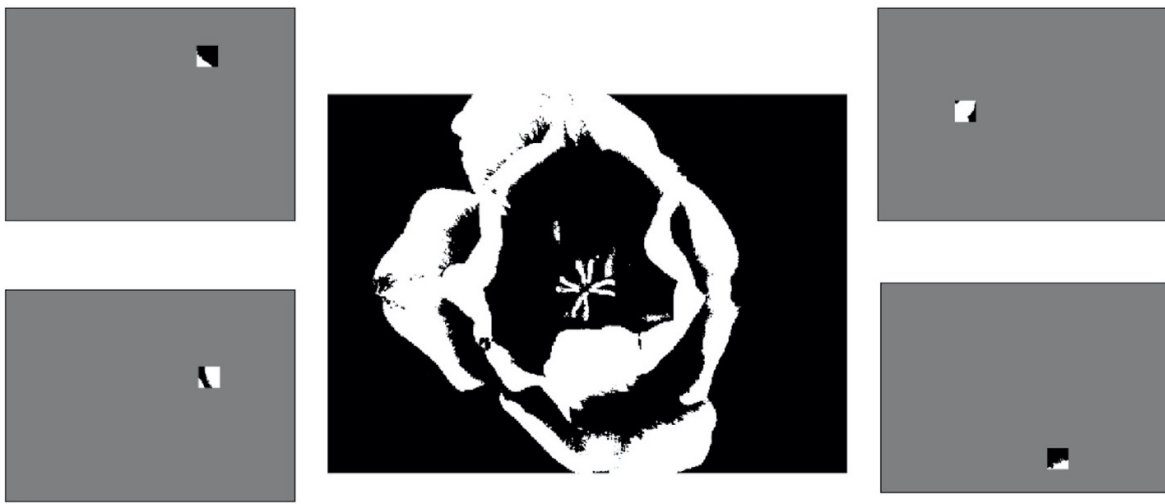

**Supplementary Figure 6. Examples of different fragments' configurations for a specific image.** Four different stimuli with one  $2.40^\circ \times 2.40^\circ$  fragment, covering 0.75% of the image area.

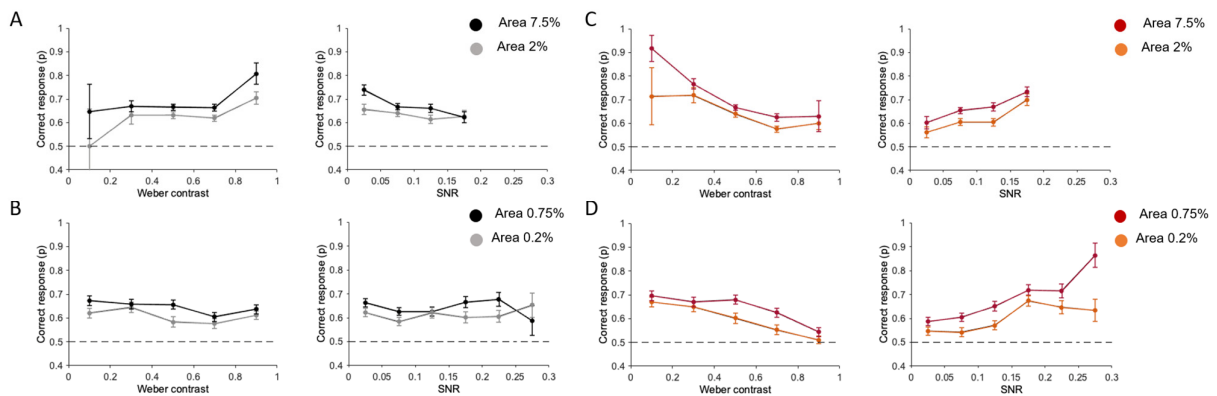

**Supplementary Figure 7. Performance as a function of fragments' Weber contrast and SNR.** (A) Task with original-contrast images with ten fragments. (B) Task with original-contrast images with one fragment. (C) Task with randomly inverted-contrast images with ten fragments. (D) Task

with randomly inverted-contrast images with one fragment. Error bars are binomial standard deviations. Observers performed 1200 trials in total (300 trials for each stimulus condition).

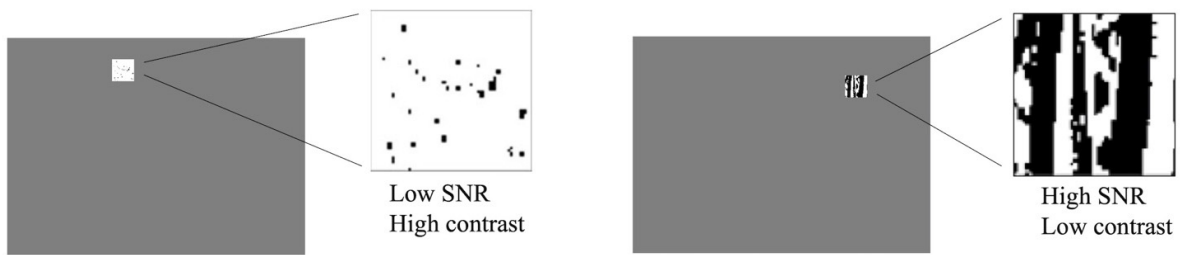

**Supplementary Figure 8. Relationship between contrast and SNR in a fragment.** Left panel: example of an almost totally white fragment, which has high contrast with respect to the background, but contains few *optimal* features (low SNR). Right panel: example of a fragment containing a textured internal structure, which has a contrast similar to the background (low contrast) but contains a high number of *optimal* features (high SNR).

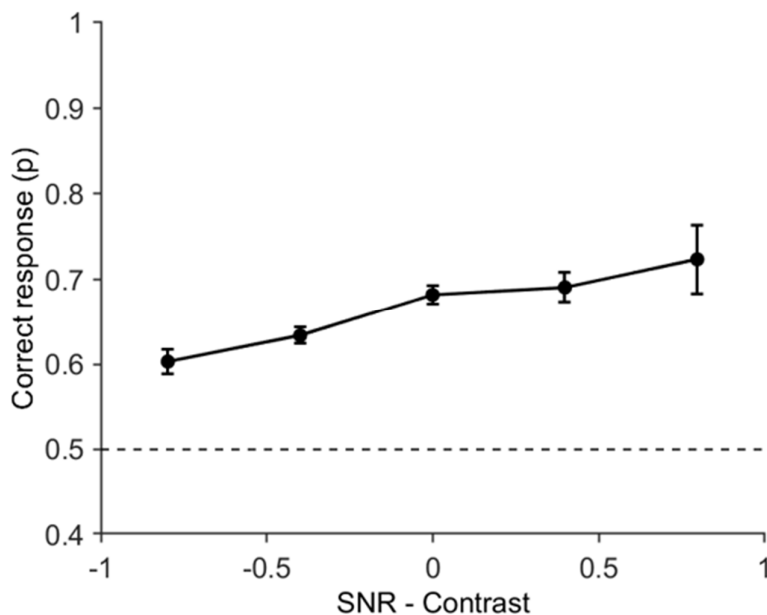

**Supplementary Figure 9. Task with randomly inverted-contrast images - Performance as a function of the difference between standardized SNR and contrast in trials with original-contrast targets.** In the graph, data from all participants ( $n = 10$ ) and area conditions (7.5%, 2%, 0.75%, 0.2%) are pooled together (bins of 0.2 each - binomial standard deviations), considering only trials where the target was not contrast-inverted (6311 trials in total).

**Supplementary Table 1.** Preliminary experiment 1 (n = 10) - Conover's post-hoc comparisons (Bonferroni correction) across average performances for each area condition (3000 trials in total per observer: 300 trials for 100% and 35.8% area conditions and 600 trials for each of other conditions).

|                   | <b>Area 100%</b> | <b>Area 35.8%</b> | <b>Area 7.5%</b> | <b>Area 2%</b> | <b>Area 0.47%</b> | <b>Area 0.12%</b> |
|-------------------|------------------|-------------------|------------------|----------------|-------------------|-------------------|
| <b>Area 100%</b>  | -                | t=0.9, p=1        | t=2.4, p=0.2     | t=3.5, p=0.01  | t=4.6, p<0.001    | t=5.2, p<0.001    |
| <b>Area 35.8%</b> | -                | -                 | t=1.5, p=1       | t=2.6, p=0.21  | t=3.6, p=0.01     | t=4.4, p<0.001    |
| <b>Area 7.5%</b>  | -                | -                 | -                | t=1.0, p=1     | t=2.1, p=0.63     | t=2.9, p=0.08     |
| <b>Area 2%</b>    | -                | -                 | -                | -              | t=1.0, p=1        | t=1.9, p=1        |
| <b>Area 0.47%</b> | -                | -                 | -                | -              | -                 | t=0.8, p=1        |
| <b>Area 0.12%</b> | -                | -                 | -                | -              | -                 | -                 |

**Supplementary Table 2.** Task with original contrast images. Marginal means and contrasts for each factor.

|                          | SNR-contrast difference<br>(standardized) | Target order presentation                        | Image repetition number |
|--------------------------|-------------------------------------------|--------------------------------------------------|-------------------------|
| Estimated marginal means | = 0.57                                    | First interval = 0.64<br>Second interval = 0.51  | = 0.57                  |
| Contrasts                | -                                         | First interval = 0.06<br>Second interval = -0.06 | -                       |

**Supplementary Table 3. Task with randomly inverted-contrast images.** Marginal means and contrasts for each factor. In the last column, 0 indicates the condition in which both the target and the distractor have inverted contrast; 1 indicates the condition in which only the target has inverted contrast; 2 indicates the condition in which only the distractor has inverted contrast; 3 indicates the condition in which both the target and the distractor have original contrast.

|                          | SNR-contrast difference (standardized) | Target order presentation                          | Image repetition number | Target contrast inversion                      |
|--------------------------|----------------------------------------|----------------------------------------------------|-------------------------|------------------------------------------------|
| Estimated marginal means | = 0.53                                 | First interval = 0.52<br>Second interval = 0.52    | = 0.53                  | 0 = 0.48<br>1 = 0.33<br>2 = 0.65<br>3 = 0.63   |
| Contrasts                | -                                      | First interval = -0.001<br>Second interval = 0.001 | -                       | 0 = -0.05<br>1 = -0.19<br>2 = 0.13<br>3 = 0.10 |

**Supplementary Table 4. Task with original contrast images in the trials with original-contrast target.** Marginal means and contrasts for each factor.

|                          | SNR-contrast difference (standardized) | Target order presentation                        | Image repetition number |
|--------------------------|----------------------------------------|--------------------------------------------------|-------------------------|
| Estimated marginal means | = 0.65                                 | First interval = 0.67<br>Second interval = 0.62  | = 0.65                  |
| Contrasts                | -                                      | First interval = 0.02<br>Second interval = -0.02 | -                       |
